# Supplementary material
Source: PubMed Central journal article supplement (PMC4975972)

**Supplemental Figure 1:** Conservation of peptides in different TG pollen proteins. Panel A shows conservation of the 13 TG T-cell antigens (TGTA), while panel B shows the conservation of TG pollen proteins that were unreactive by both T-cell and B-cell responses.

**Supplemental Figure 2:** Cytokine release by T-cells after two weeks of peptide culture. Shown are the IFN- $\gamma$  and the IL-5 release by T-cells restimulated either with the peptide they were originally cultured with or restimulated with a relevant peptide pool or an irrelevant peptide pool or Timothy Grass extract. Each bar represents Average SFC  $\pm$  SEM.

**Supplemental Figure 3:** Separate analysis of correlation between cross-reactivity and conservation for IUIS allergen peptides and TGTA peptides. The analysis performed is the same as in Figure 3, but splits out peptides from known IUIS allergens vs. TGTA proteins.

**Supplemental Figure 4:** A) Additional T-cell clones generated from the same culture (with Phl p peptide P5) as shown in Figure 4. B) Elispot data from the cell line (top) and proliferation from individual T-cell clones (bottom) derived from another culture with Phlp peptide P7.

| Patient ID | Gender                | Age   | Grasses |       |       |       | Trees |       |       |       | Weeds |       | Used in Study | Season         |              |
|------------|-----------------------|-------|---------|-------|-------|-------|-------|-------|-------|-------|-------|-------|---------------|----------------|--------------|
|            |                       |       | Phl p   | Cyn d | Poa p | Lol p | Ant o | Fra e | Bet v | Que a | Ole e | Pla l |               |                | Amp p        |
| D00004     | female                | 25    | YES     | YES   | YES   | YES   | YES   | NO    | NO    | YES   | YES   | YES   | NO            | iUIS           | IN           |
| D00008     | male                  | 28    | YES     | YES   | YES   | YES   | YES   | NO    | NO    | NO    | NO    | NO    | YES           | iUIS           | IN           |
| D00010     | male                  | 50    | YES     | YES   | YES   | YES   | NO            | iUIS           | IN           |
| D00012     | female                | 45    | YES     | YES   | YES   | YES   | YES   | NO    | NO    | NO    | YES   | NO    | NO            | iUIS           | IN           |
| D00015     | female                | 40    | YES     | YES   | YES   | YES   | NO    | YES   | YES   | NO    | NO    | NO    | YES           | iUIS           | IN           |
| D00016     | male                  | 54    | YES     | YES   | YES   | YES   | YES   | YES   | YES   | YES   | NO    | NO    | NO            | ATGA           | IN           |
| D00017     | female                | 62    | YES     | NO    | NO    | YES   | NO    | YES   | NO    | NO    | NO    | NO    | NO            | ATGA           | IN           |
| D00020     | female                | 40    | YES     | YES   | YES   | YES   | YES   | YES   | YES   | YES   | NO    | YES   | YES           | iUIS           | IN           |
| D00039     | male                  | 31    | YES     | YES   | YES   | YES   | YES   | NO    | NO    | NO    | NO    | NO    | YES           | iUIS           | OUT          |
| D00041     | female                | 26    | YES     | NO    | YES   | YES   | YES   | NO    | NO    | NO    | NO    | NO    | NO            | iUIS           | OUT          |
| D00042     | male                  | 42    | YES     | YES   | YES   | YES   | YES   | NO    | NO    | NO    | NO    | NO    | NO            | iUIS           | OUT          |
| D00045     | female                | 21    | YES     | NO    | NO    | YES   | YES   | NO    | NO    | NO    | NO    | NO    | YES           | iUIS           | OUT          |
| D00053     | female                | 50    | YES     | NO    | YES   | YES   | YES   | NO    | NO    | NO    | NO    | NO    | NO            | iUIS           | OUT          |
| D00056     | male                  | 42    | YES     | NO    | YES   | NO    | YES   | NO    | NO    | NO    | NO    | NO    | NO            | iUIS           | OUT          |
| D00061     | female                | 52    | YES     | NO    | YES   | YES   | YES   | YES   | NO    | NO    | NO    | NO    | NO            | iUIS           | OUT          |
| D00062     | male                  | 27    | YES     | YES   | YES   | YES   | YES   | YES   | YES   | NO    | YES   | YES   | YES           | iUIS           | OUT          |
| D00073     | female                | 44    | YES     | NO    | YES   | NO    | YES   | NO    | YES   | NO    | NO    | YES   | NO            | ATGA           | OUT          |
| D00078     | male                  | 54    | YES     | YES   | YES   | YES   | YES   | YES   | NO    | YES   | NO    | NO    | NO            | CR             | OUT          |
| D00084     | male                  | 30    | YES     | YES   | YES   | YES   | YES   | YES   | YES   | YES   | NO    | YES   | YES           | ATGA, CR       | OUT          |
| D00089     | female                | 62    | YES     | NO    | NO    | YES   | NO    | YES   | NO    | NO    | NO    | NO    | NO            | CR             | OUT          |
| D00090     | male                  | 42    | YES     | YES   | NO            | ATGA           | OUT          |
| D00092     | female                | 39    | YES     | YES   | YES   | NO            | ATGA           | OUT          |
| D00102     | male                  | 28    | YES     | YES   | YES   | YES   | YES   | NO    | NO    | NO    | NO    | NO    | YES           | ATGA           | IN           |
| D00104     | male                  | 61    | YES     | YES   | YES   | YES   | NO    | NO    | NO    | NO    | NO    | NO    | YES           | ATGA, CR       | IN           |
| D00117     | female                | 53    | YES     | NO    | YES   | YES   | NO            | ATGA           | OUT          |
| U00001     | female                | 20    | YES     | YES   | YES   | YES   | YES   | NO    | NO    | YES   | YES   | NO    | YES           | iUIS           | OUT          |
| U00013     | female                | 22    | YES     | YES   | YES   | YES   | YES   | YES   | YES   | NO    | YES   | YES   | YES           | iUIS           | OUT          |
| U00016     | female                | 34    | YES     | YES   | YES   | YES   | YES   | YES   | YES   | YES   | YES   | YES   | YES           | iUIS           | OUT          |
| U00022     | female                | 29    | YES     | YES   | YES   | YES   | YES   | NO    | NO    | NO    | NO    | NO    | YES           | iUIS           | OUT          |
| U00029     | female                | 22    | YES     | YES   | YES   | YES   | YES   | NO    | YES   | YES   | YES   | YES   | YES           | iUIS           | OUT          |
| U00032     | female                | 21    | YES     | YES   | YES   | YES   | YES   | YES   | YES   | YES   | YES   | YES   | YES           | iUIS           | OUT          |
| U00039     | male                  | 29    | YES     | YES   | YES   | YES   | YES   | NO    | YES   | YES   | YES   | YES   | YES           | iUIS           | OUT          |
| U00043     | male                  | 33    | YES     | YES   | YES   | YES   | YES   | YES   | NO    | YES   | NO    | NO    | NO            | iUIS           | OUT          |
| U00057     | male                  | 56    | YES     | NO    | YES   | YES   | YES   | NO    | NO    | NO    | NO    | NO    | NO            | iUIS           | OUT          |
| U00058     | female                | 22    | YES     | YES   | YES   | YES   | YES   | YES   | NO    | YES   | YES   | YES   | YES           | iUIS, ATGA, CR | OUT          |
| U00062     | female                | 22    | YES     | YES   | YES   | YES   | YES   | YES   | YES   | NO    | YES   | YES   | YES           | iUIS           | OUT          |
| U00095     | male                  | 52    | YES     | NO    | YES   | YES   | YES   | NO    | NO    | NO    | NO    | NO    | YES           | ATGA           | OUT          |
| U00098     | male                  | 22    | YES     | YES   | YES   | YES   | YES   | NO    | YES   | YES   | YES   | YES   | YES           | ATGA, CR       | OUT          |
| U00106     | male                  | 19    | YES     | YES   | YES   | YES   | YES   | YES   | YES   | YES   | YES   | YES   | YES           | ATGA, CR       | OUT          |
| U00125     | male                  | 23    | YES     | NO    | YES   | YES   | YES   | YES   | NO    | YES   | YES   | YES   | YES           | ATGA           | OUT          |
| U00129     | male                  | 22    | YES     | YES   | YES   | YES   | YES   | NO    | NO    | YES   | YES   | YES   | YES           | ATGA           | IN           |
| U00140     | male                  | 29    | YES     | NO    | YES   | YES   | YES   | NO    | NO    | NO    | NO    | YES   | NO            | ATGA           | OUT          |
| U00147     | male                  | 23    | YES     | YES   | YES   | YES   | YES   | YES   | YES   | YES   | YES   | YES   | YES           | ATGA, CR       | OUT          |
| U00150     | female                | 19    | YES     | YES   | YES   | YES   | YES   | YES   | YES   | YES   | YES   | YES   | YES           | ATGA, CR       | OUT          |
| U00151     | male                  | 23    | YES     | YES   | YES   | YES   | YES   | YES   | YES   | YES   | YES   | YES   | YES           | ATGA, CR       | OUT          |
| U00153     | female                | 21    | YES     | YES   | YES   | YES   | YES   | YES   | YES   | YES   | YES   | YES   | YES           | ATGA           | IN           |
| 1140       | male                  | 21    | YES     | N/A   | N/A   | N/A   | N/A   | N/A   | YES   | N/A   | N/A   | N/A   | N/A           | CR             | OUT          |
| 1249       | male                  | 45    | YES     | N/A   | N/A   | N/A   | N/A   | N/A   | YES   | N/A   | N/A   | N/A   | N/A           | CR             | OUT          |
| 1250       | female                | 47    | YES     | N/A   | N/A   | N/A   | N/A   | N/A   | YES   | N/A   | N/A   | N/A   | N/A           | CR             | OUT          |
| 1370       | male                  | 35    | YES     | N/A   | N/A   | N/A   | N/A   | N/A   | YES   | N/A   | N/A   | N/A   | N/A           | CR             | OUT          |
| 1372       | female                | 43    | YES     | N/A   | N/A   | N/A   | N/A   | N/A   | NO    | N/A   | N/A   | N/A   | N/A           | CR             | OUT          |
| 1373       | female                | 37    | YES     | N/A   | N/A   | N/A   | N/A   | N/A   | NO    | N/A   | N/A   | N/A   | N/A           | CR             | OUT          |
| 1376       | female                | 37    | YES     | N/A   | N/A   | N/A   | N/A   | N/A   | YES   | N/A   | N/A   | N/A   | N/A           | CR             | OUT          |
| 1378       | male                  | 51    | YES     | N/A   | N/A   | N/A   | N/A   | N/A   | YES   | N/A   | N/A   | N/A   | N/A           | CR             | OUT          |
| 1379       | female                | 51    | YES     | N/A   | N/A   | N/A   | N/A   | N/A   | NO    | N/A   | N/A   | N/A   | N/A           | CR             | OUT          |
| Summary    | 28 female/<br>27 male | 19-62 | 55/55   | 33/46 | 42/46 | 42/46 | 38/46 | 21/46 | 24/55 | 20/46 | 19/46 | 21/46 | 27/46         |                | 16 IN/39 OUT |

**Supplementary Table 1:** Donor Information- YES: The patient had a positive skin prick test or a RAST with specific IgE  $\geq 0.35$  kU/L in response to the allergen tested, NO: The patient had a negative skin prick test or RAST with specific IgE  $< 0.35$  kU/L in response to the allergen tested. N/A: The skin prick test or RAST data is not available for this allergen in this patient.

|                               | Sweet               |                        |                      |            | Rye          |              | English         | Kentucky          |            |
|-------------------------------|---------------------|------------------------|----------------------|------------|--------------|--------------|-----------------|-------------------|------------|
| <b>common name</b>            | <b>vernal grass</b> | <b>Western ragweed</b> | <b>Bermuda grass</b> | <b>Ash</b> | <b>grass</b> | <b>Olive</b> | <b>plantain</b> | <b>blue grass</b> | <b>Oak</b> |
| <b>abbreviation</b>           | AO                  | AP                     | CD                   | FE         | LP           | OE           | PL              | PP                | QA         |
| <b>reads (millions)</b>       | 75.4                | 62.7                   | 66.3                 | 75.6       | 65.1         | 73.5         | 59.0            | 67.2              | 63.5       |
| <b>bases (MB)</b>             | 7,535               | 6,271                  | 6,625                | 7,559      | 6,511        | 7,353        | 5,898           | 6,717             | 6,354      |
| <b>assembled scaffolds</b>    | 317,874             | 121,659                | 112,527              | 81,401     | 122,266      | 74,333       | 57,102          | 128,174           | 54,280     |
| <b>median scaffold length</b> | 544                 | 390                    | 842                  | 722        | 631          | 710          | 696             | 635               | 634        |
| <b>max scaffold length</b>    | 11,515              | 8,325                  | 14,364               | 9,838      | 9,631        | 8,133        | 8,090           | 10,100            | 14,807     |

**Supplemental Table 2:** Sequencing and assembly statistics

| IUIS               | ATGA                 |
|--------------------|----------------------|
| P1=EEWEPLTKKGNVWEV | P9=ELRKTYNLLDAVSRH   |
| P2=NVWEVKSSKPLVGPF | P10=AVMLTFDNAGMWNVR  |
| P3=KPPFSGMTGCGNTPI | P11=IGSFFYFPSIGMQRT  |
| P4=STWYGKPTGAGPKDN | P12=QVYPRSWSAVMLTFD  |
| P5=GELELQFRRVKCKYP | P13=AAYLATRGLDVVDAV  |
| P6=SGIAFGSMAKKGDEQ | P14=NFTVGRIEEEFTAKG  |
| P7=AFKVAATAANAAPAN | P15=APSGRIVMELYADV   |
| P8=LAKYKANWIEIMRIK | P16=HYKGSSFHRVIPGFM  |
|                    | P17=IEEEFTAKGFTVQEM  |
|                    | P18=GEVLNALAYDVPIPG  |
|                    | P19=NGSQFFLCTAKTAWL  |
|                    | P20=VKLRRSSAAQVDGFY  |
|                    | P21=VVSRLLIIPVPFDPPA |
|                    | P22=GDLYIFESRAICKYA  |
|                    | P23=NPMTVFWSKMAQSMT  |
|                    | P24=CDASILIDPLSNQSA  |
|                    | P25=PRRWLRFCNPELSEI  |
|                    | P26=QYAKEIWGITANPVP  |
|                    | P27=LVSKLYEVVPGILTE  |

**Supplementary Table 3:** Sequences for Peptides used in Cross-Reactivity Studies

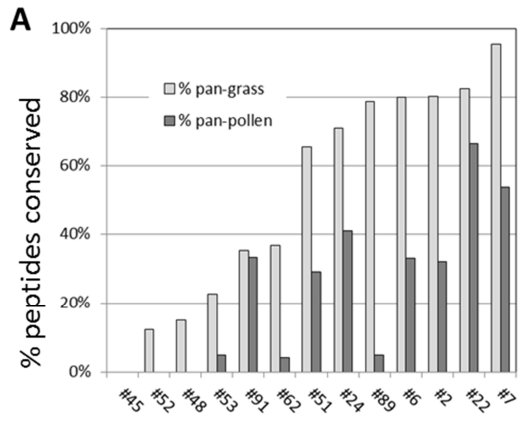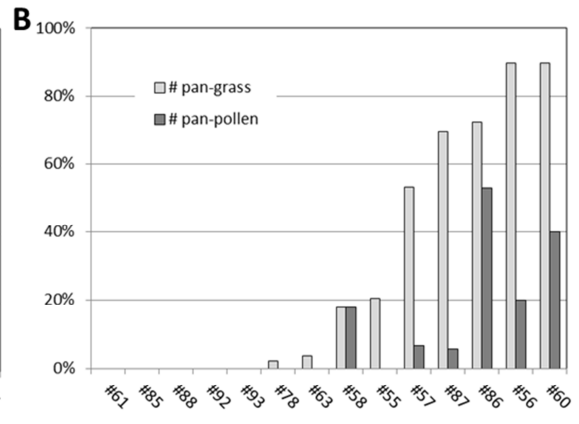

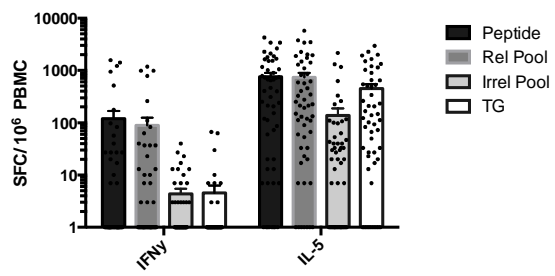

### IUIS Allergens

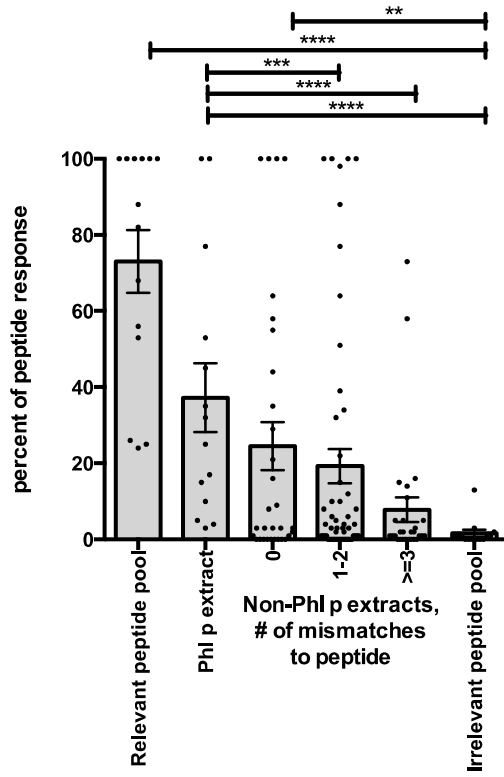

### NTGA Peptides

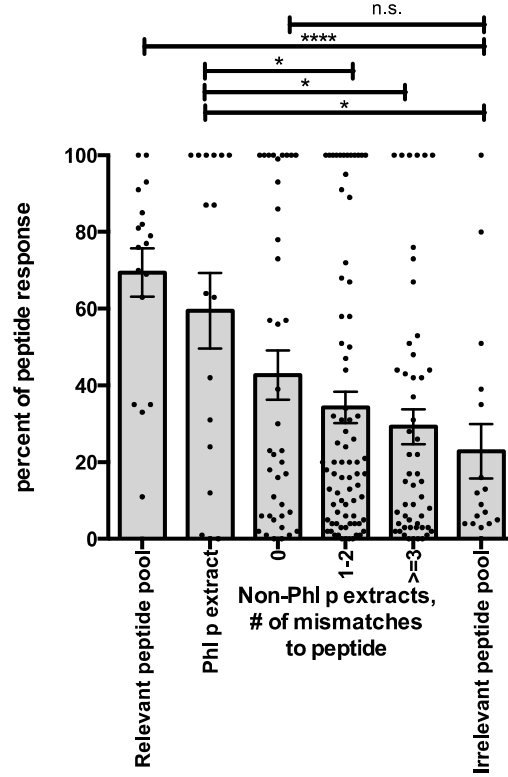

**A**

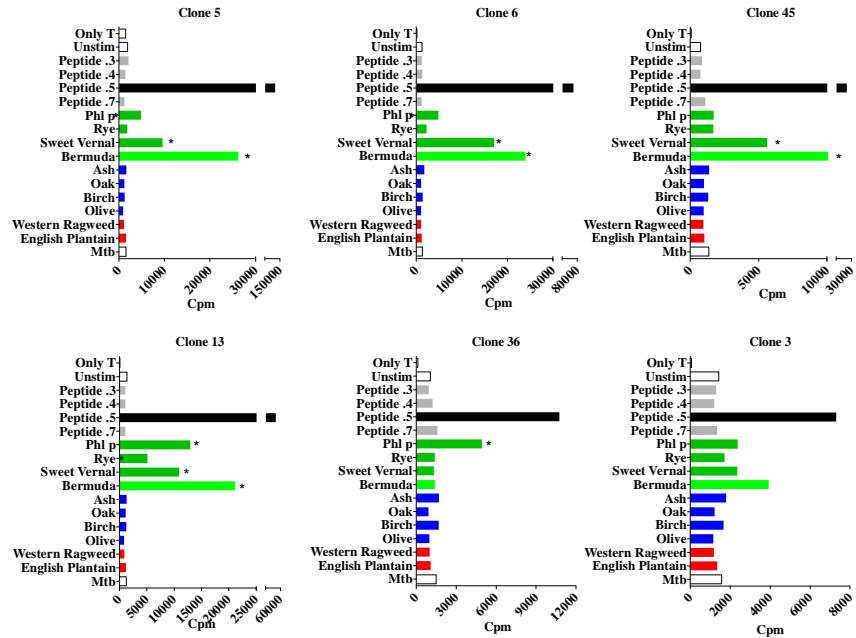

**B**

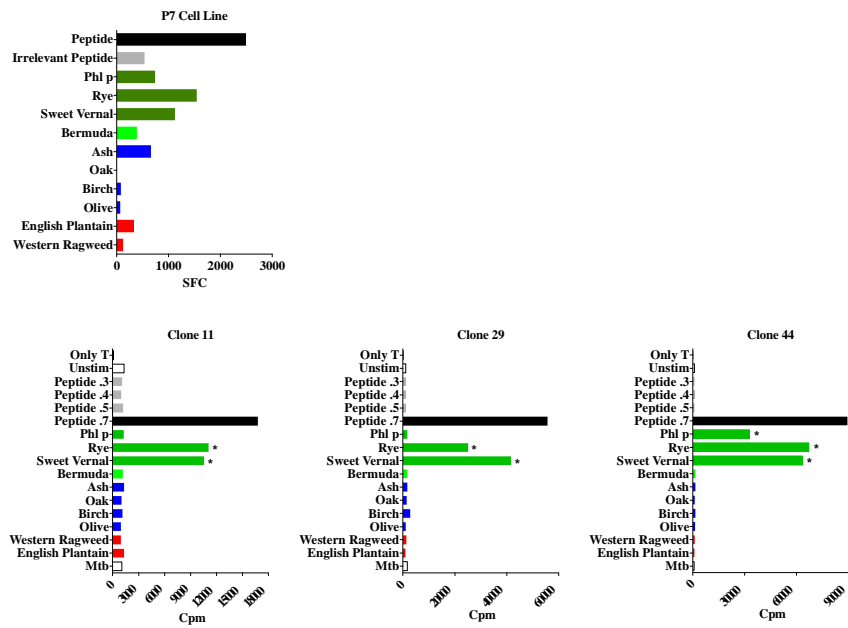

Supplement: NIHMS760287-supplement-01.pdf [file NIHMS760287-supplement-01.pdf]
